# Supplementary material
Source: PubMed Central journal article supplement (PMC9890220)
Supplement: izac175_suppl_supplementary_figure_s1.pdf [file izac175_suppl_supplementary_figure_s1.pdf]

### **Ulcerative Colitis**

*Please answer based on how you have been feeling over the past 48 hours:*

|                                                               |                                            |
|---------------------------------------------------------------|--------------------------------------------|
| <b>1. Rectal Bleeding</b>                                     | <b>≥ 1=Patient-reported active disease</b> |
| <input type="checkbox"/> None                                 | =0                                         |
| <input type="checkbox"/> Small amount only (< 50% of stools)  | =1                                         |
| <input type="checkbox"/> Small amount with most stools        | =2                                         |
| <input type="checkbox"/> Large amount (>50% of stool content) | =3                                         |
| <b>2. Number of stools per 24 hours</b>                       | <b>≥ 1=Patient-reported active disease</b> |
| <input type="checkbox"/> 0-2                                  | =0                                         |
| <input type="checkbox"/> 3-5                                  | =1                                         |
| <input type="checkbox"/> 6-8                                  | =2                                         |
| <input type="checkbox"/> >8                                   | =3                                         |

### **Crohn's Disease**

*Please answer based on how you have been feeling over the past 7 days:*

|                                                                                |                                           |
|--------------------------------------------------------------------------------|-------------------------------------------|
| <b>1. Abdominal Pain</b>                                                       | <b>2=Patient-reported active disease</b>  |
| <input type="checkbox"/> No Pain                                               | =0                                        |
| <input type="checkbox"/> Mild, brief, not interfering with activities          | =1                                        |
| <input type="checkbox"/> Moderate/severe: Daily, affects activities, nocturnal | =2                                        |
| <b>3. Stools (per day)</b>                                                     | <b>≥1=Patient-reported active disease</b> |
| <input type="checkbox"/> 0-1 liquid stools, no blood                           | =0                                        |
| <input type="checkbox"/> Up to two semifformed with small blood, or 2-5 liquid | =1                                        |
| <input type="checkbox"/> Gross bleeding, ≥ 6 liquid or nocturnal diarrhea      | =2                                        |
