# Supplementary material
Source: PubMed Central journal article supplement (PMC9890220)
Supplement: izac175_suppl_supplementary_figure_s2.pdf [file izac175_suppl_supplementary_figure_s2.pdf]

Crohn's Disease

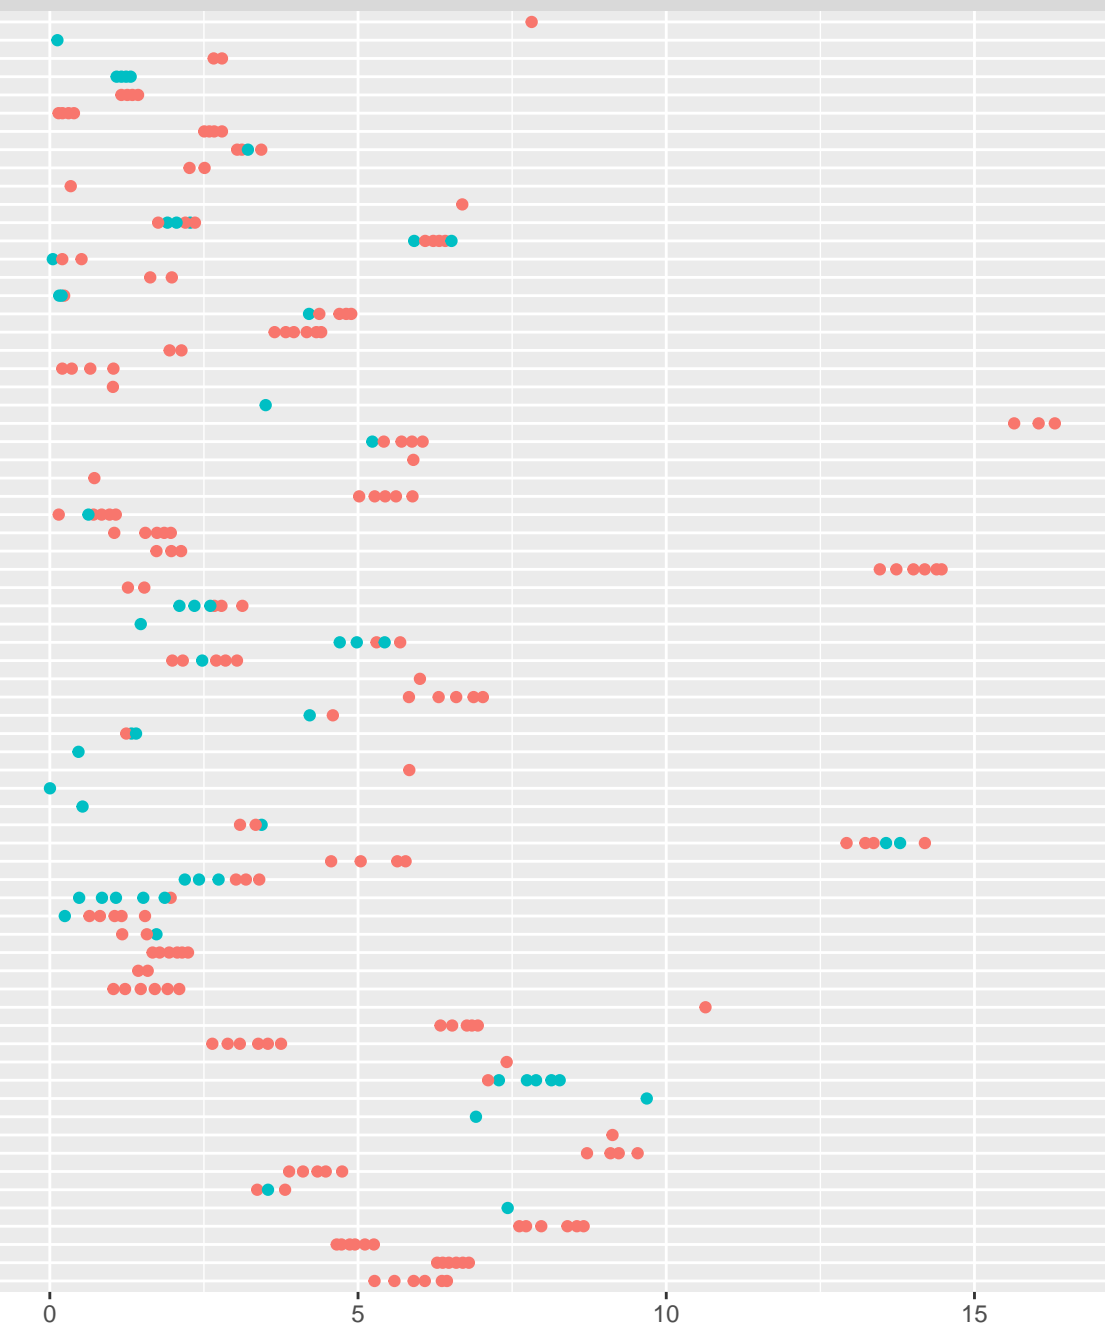

Ulcerative Colitis

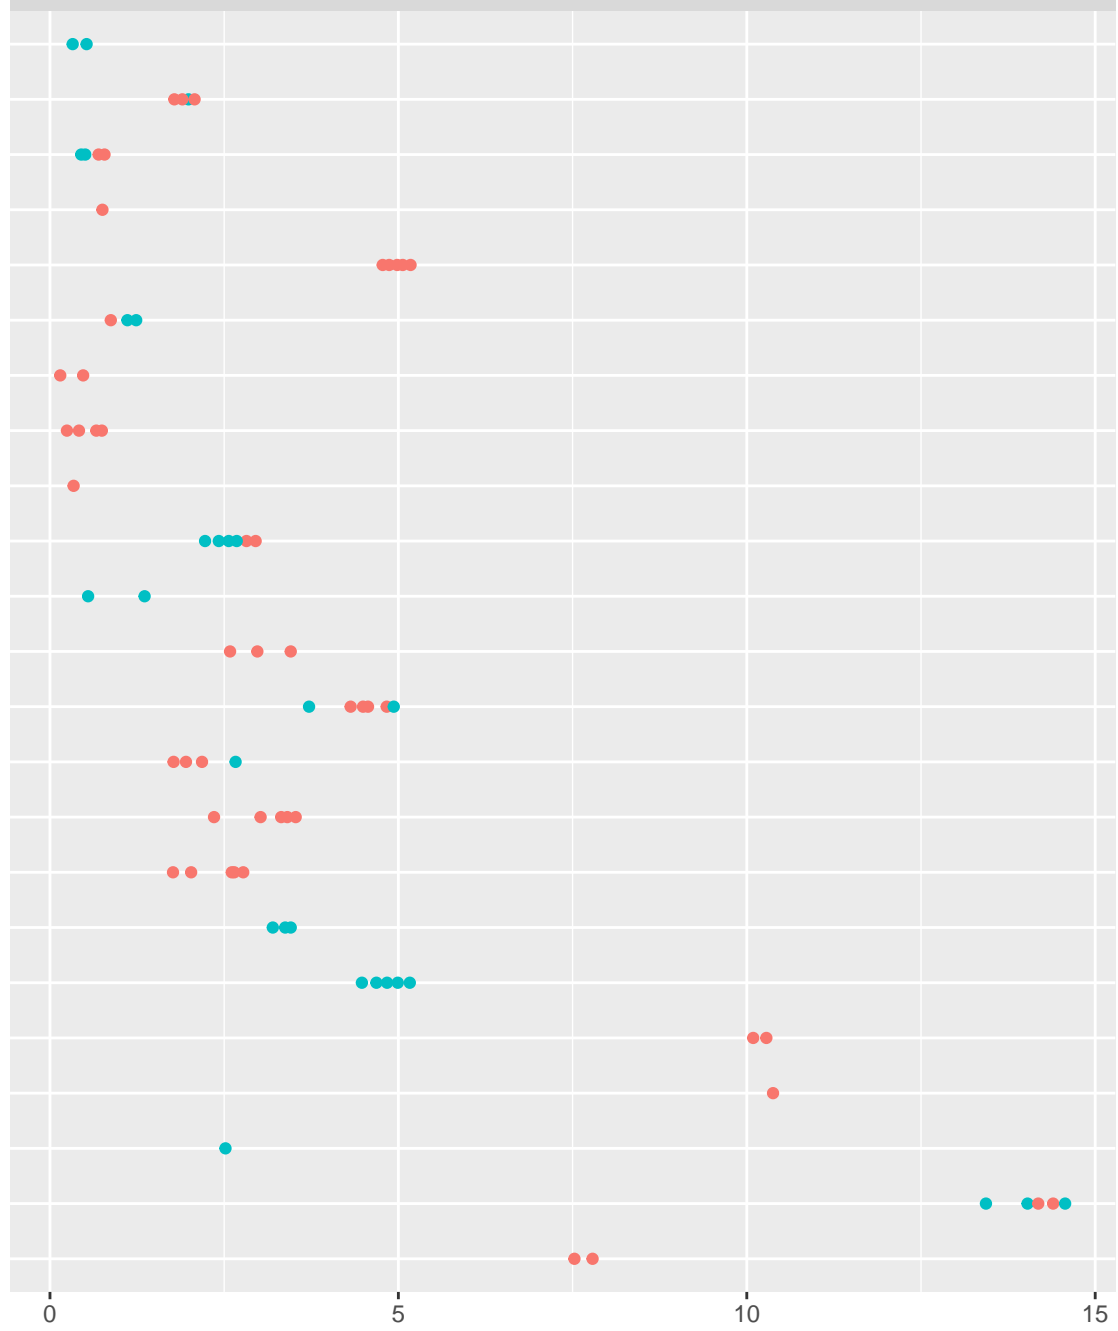

Time from Diagnosis to Sample Collection (years)

PR Active Symptoms No Yes
