# Supplementary material
Source: PubMed Central journal article supplement (PMC9890220)

**A**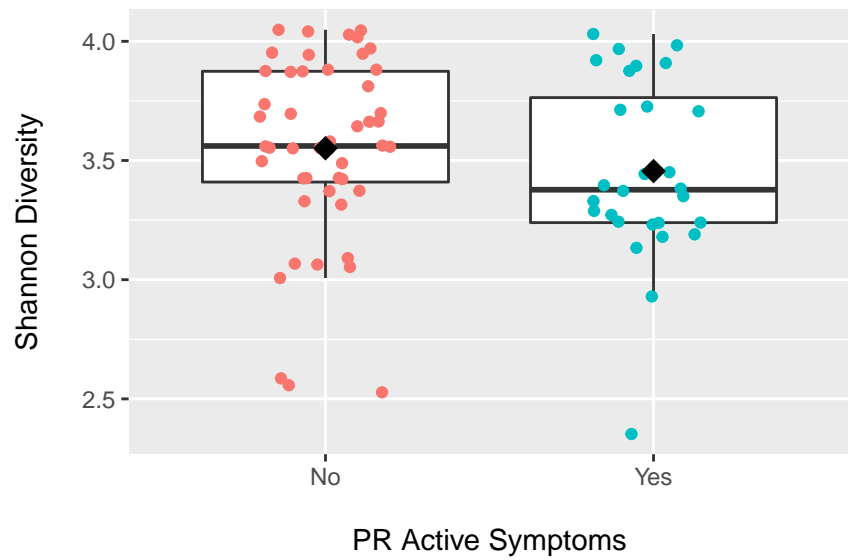**B**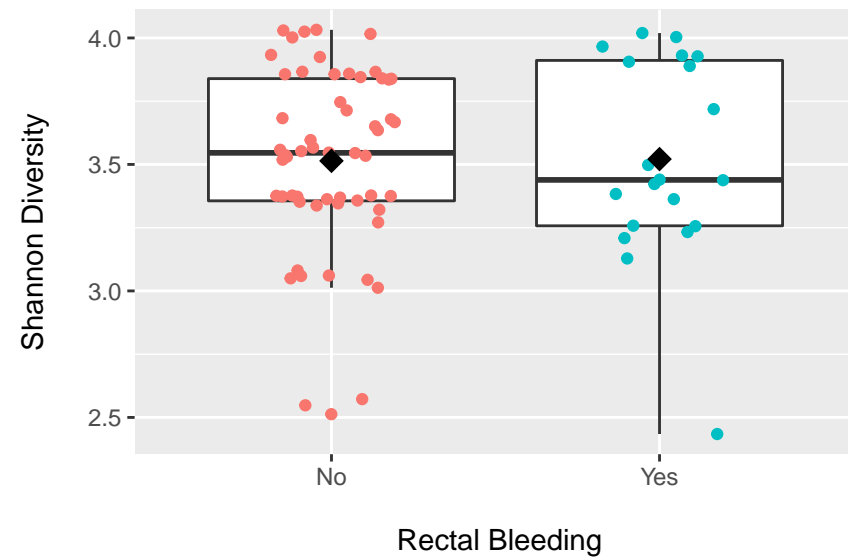**C**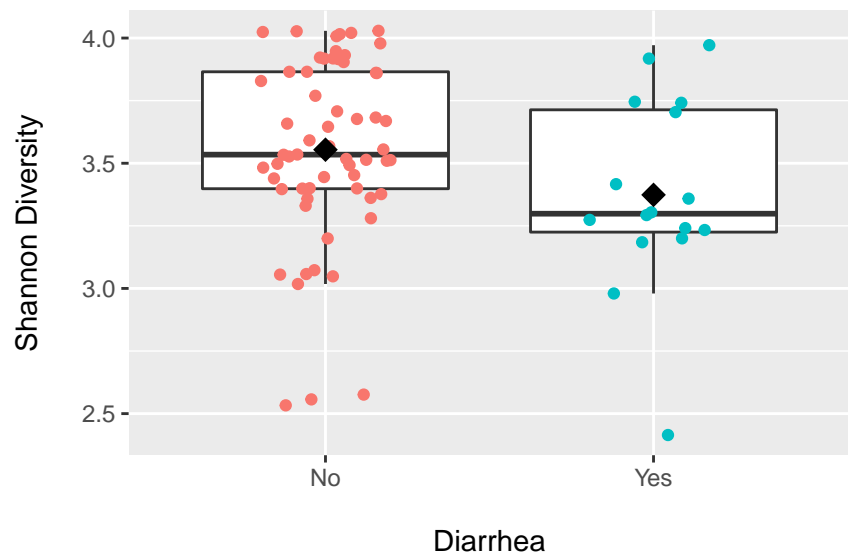**D**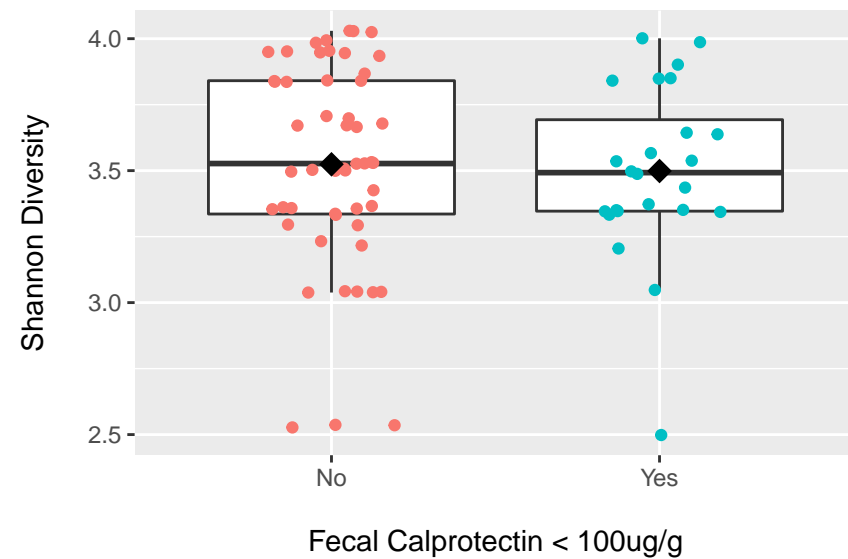**E**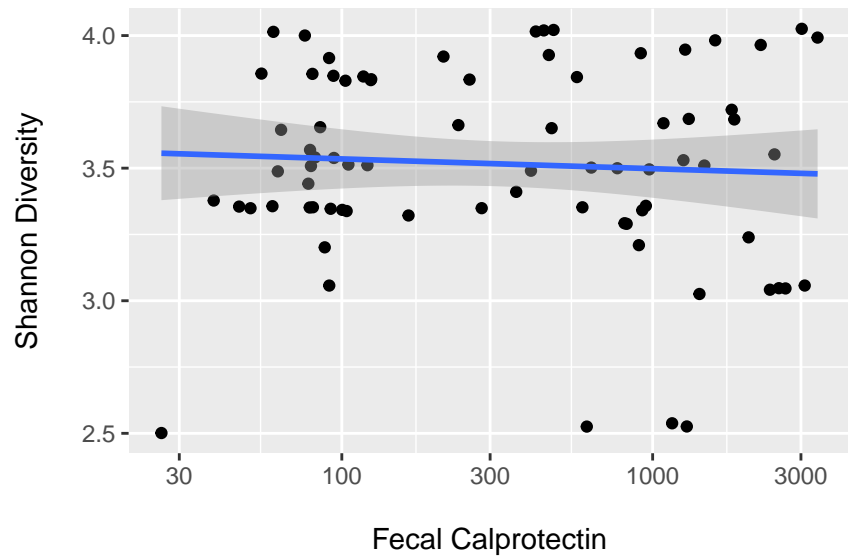

Supplement: izac175_suppl_supplementary_figure_s3.pdf [file izac175_suppl_supplementary_figure_s3.pdf]

**A**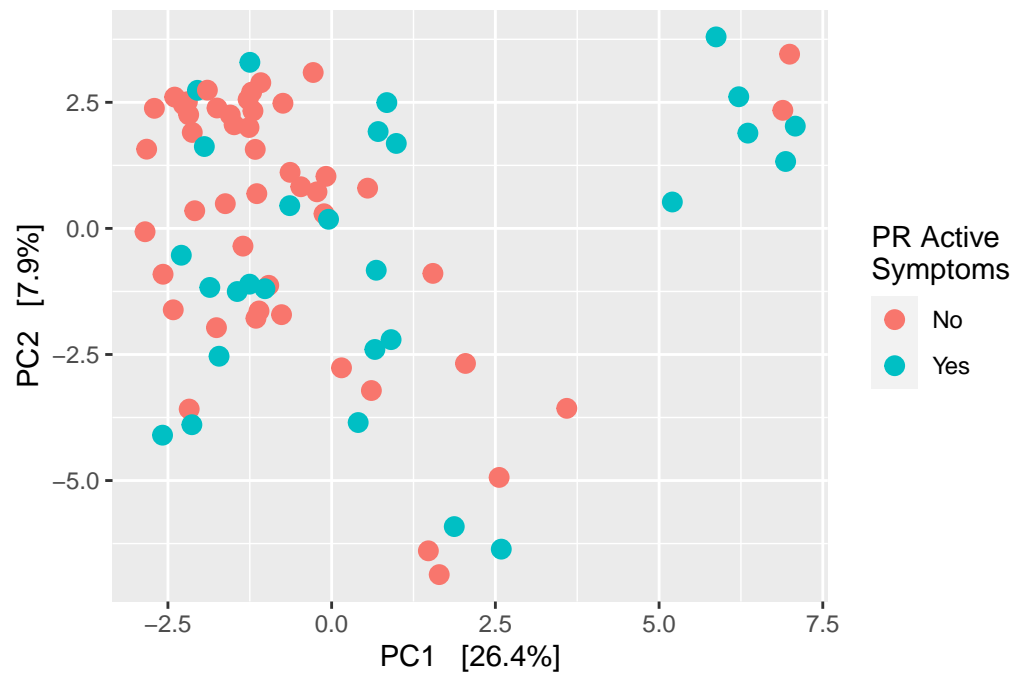**B**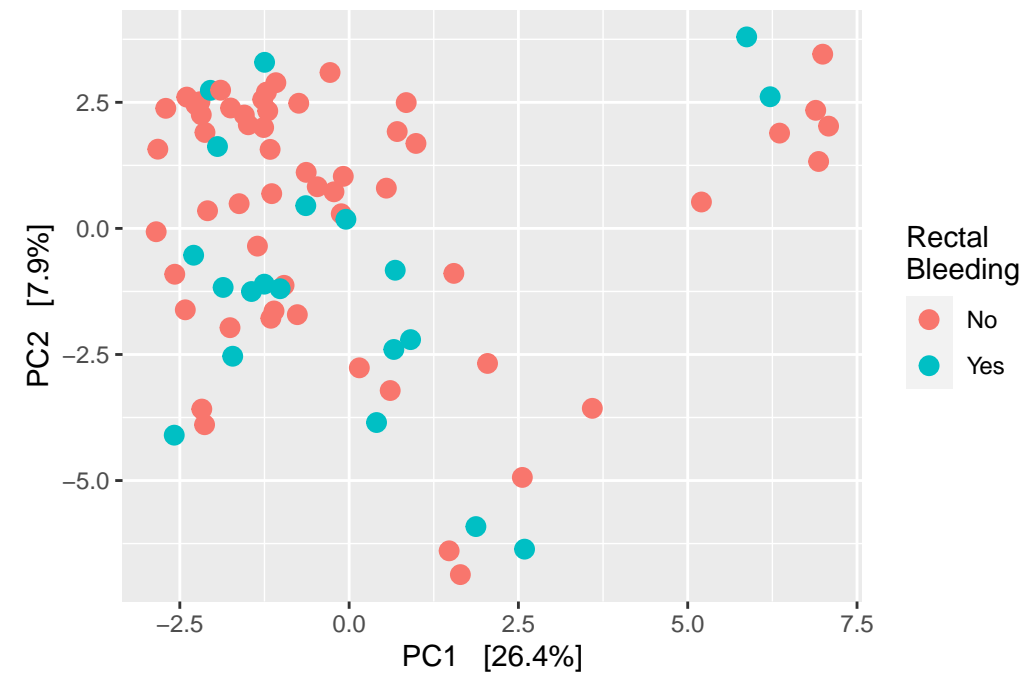**C**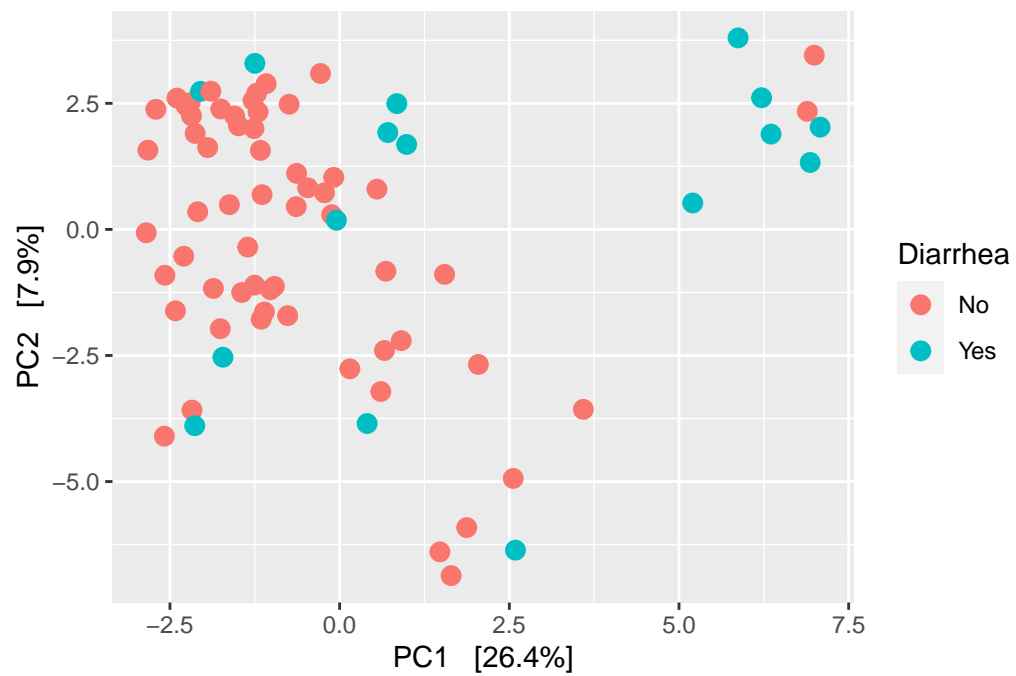**D**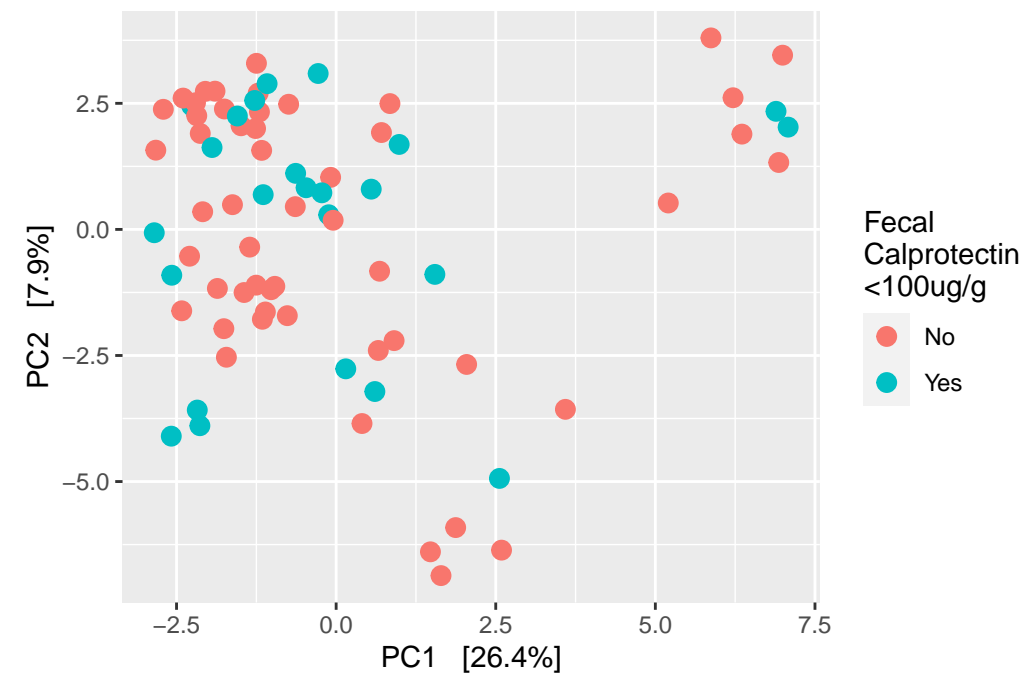**E**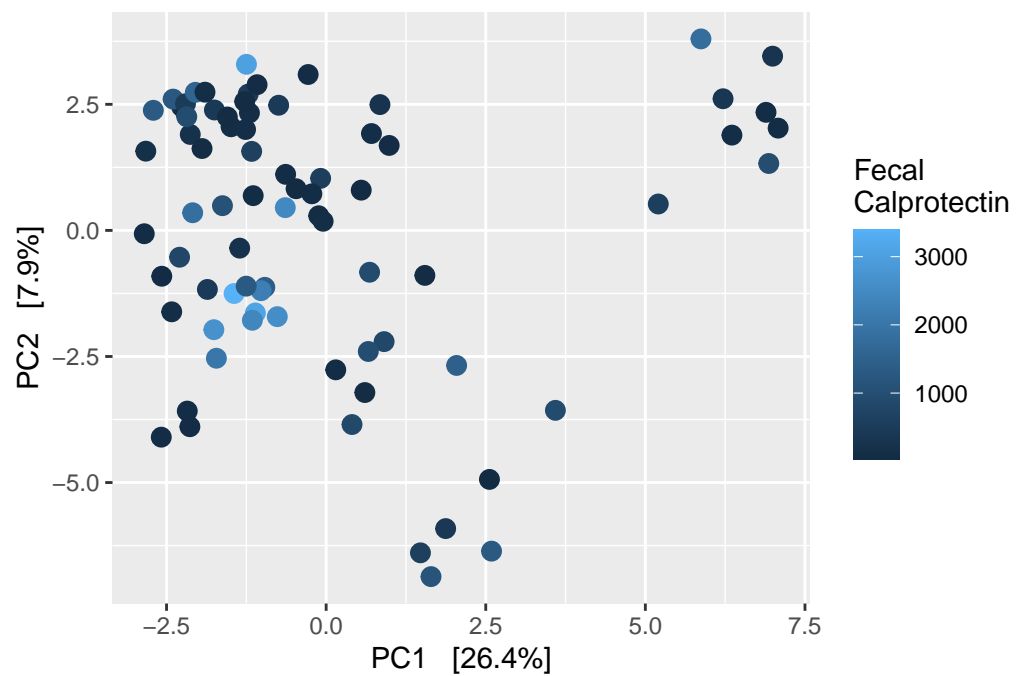

Supplement: izac175_suppl_supplementary_figure_s4.pdf [file izac175_suppl_supplementary_figure_s4.pdf]

**A**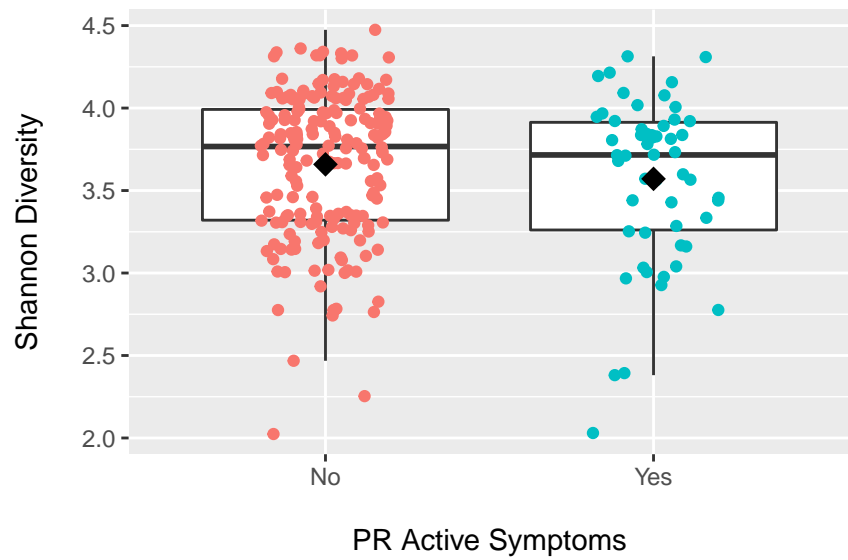**B**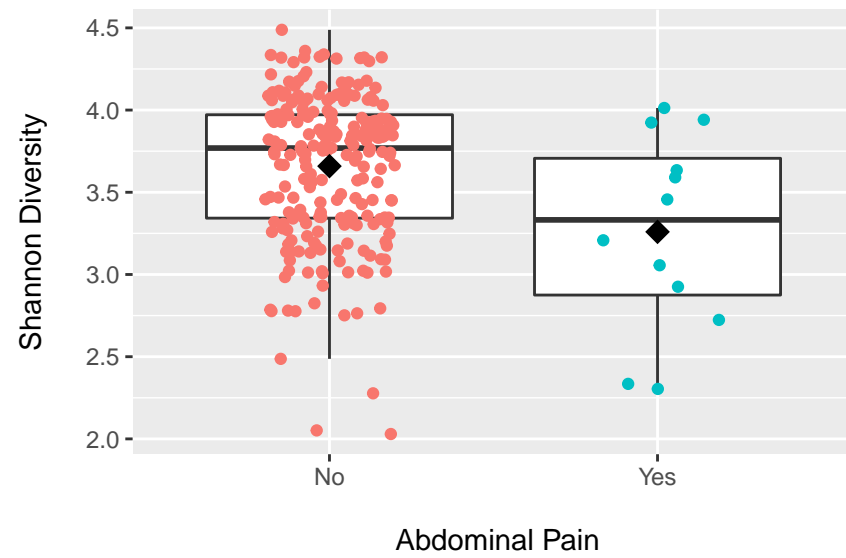**C**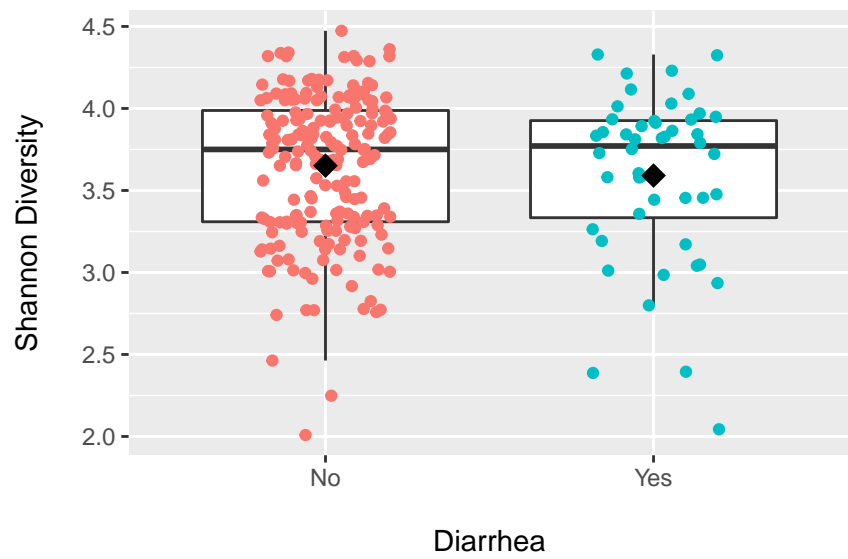**D**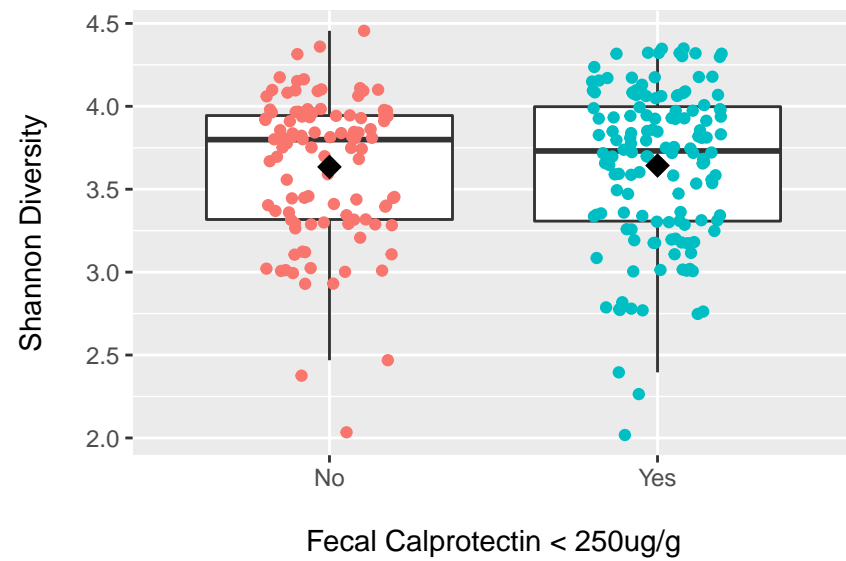**E**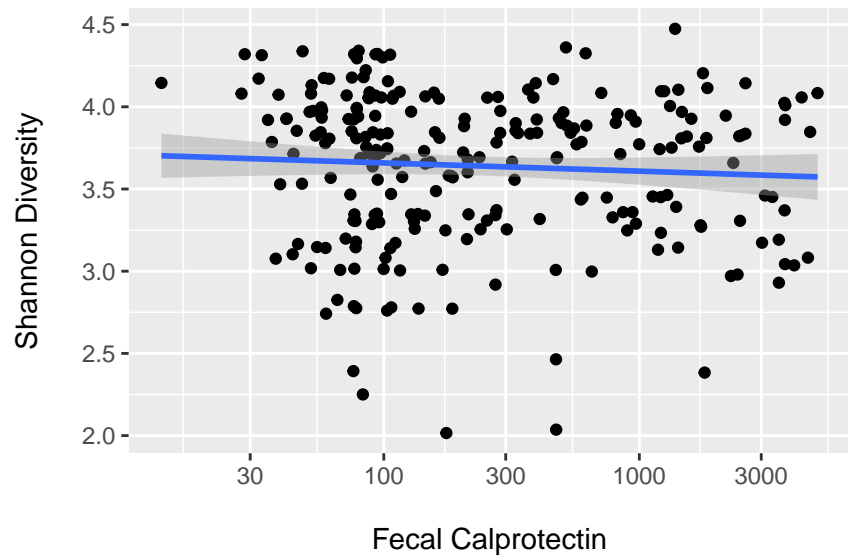

Supplement: izac175_suppl_supplementary_figure_s6.pdf [file izac175_suppl_supplementary_figure_s6.pdf]

**A**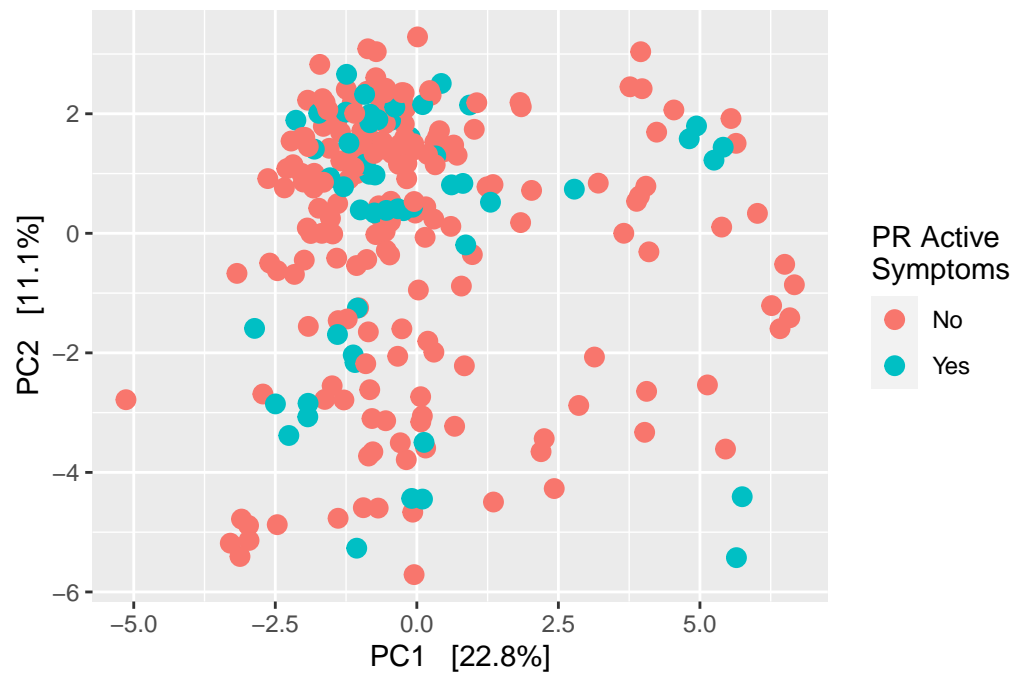**B**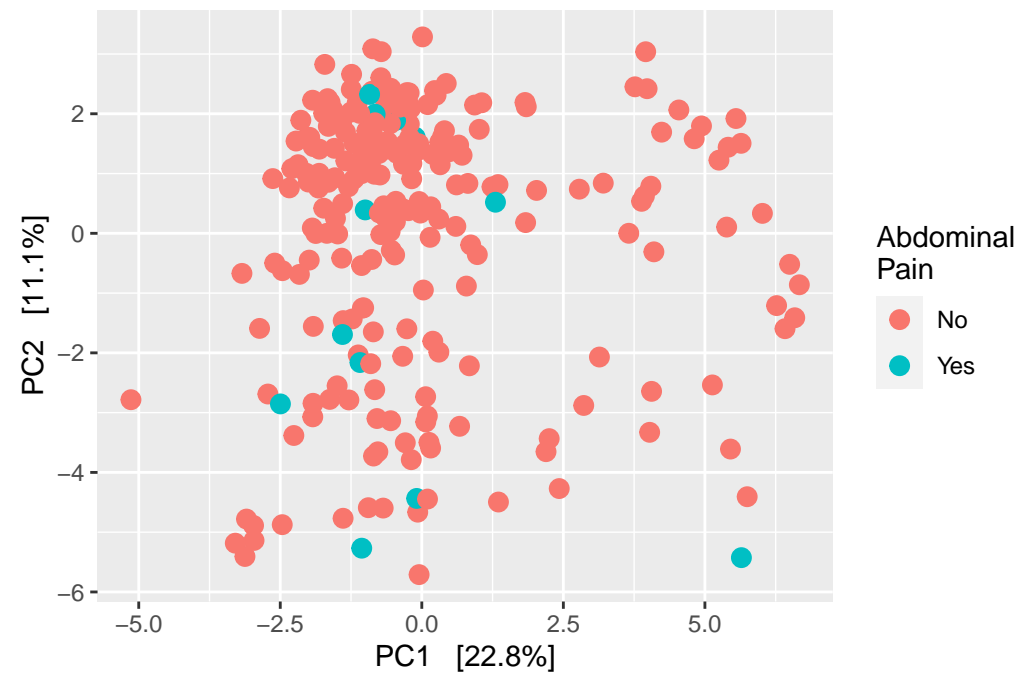**C**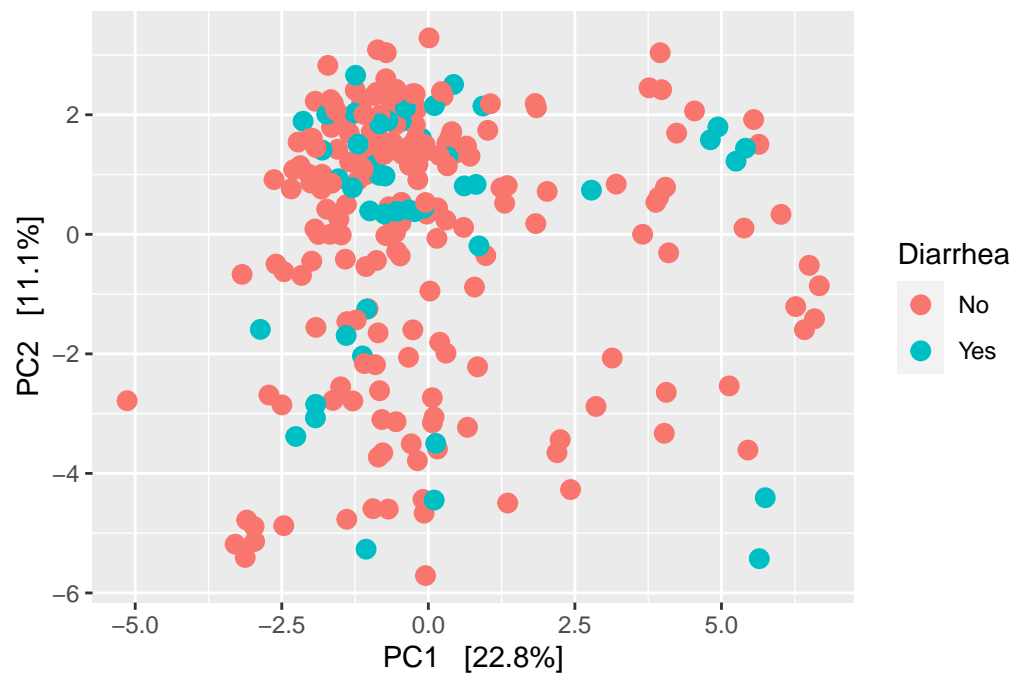**D**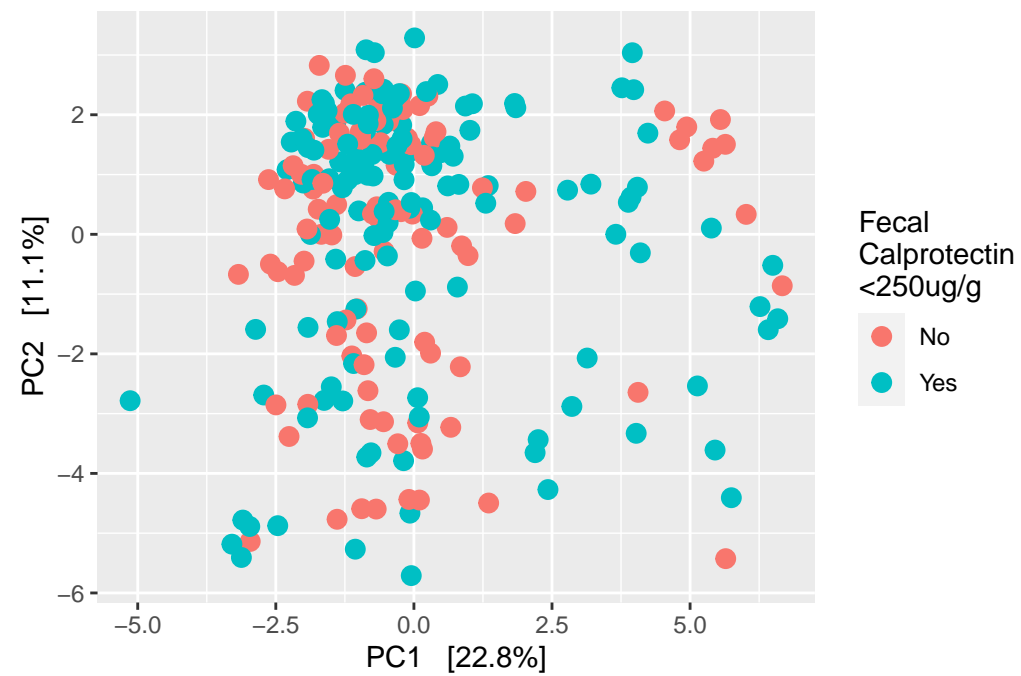**E**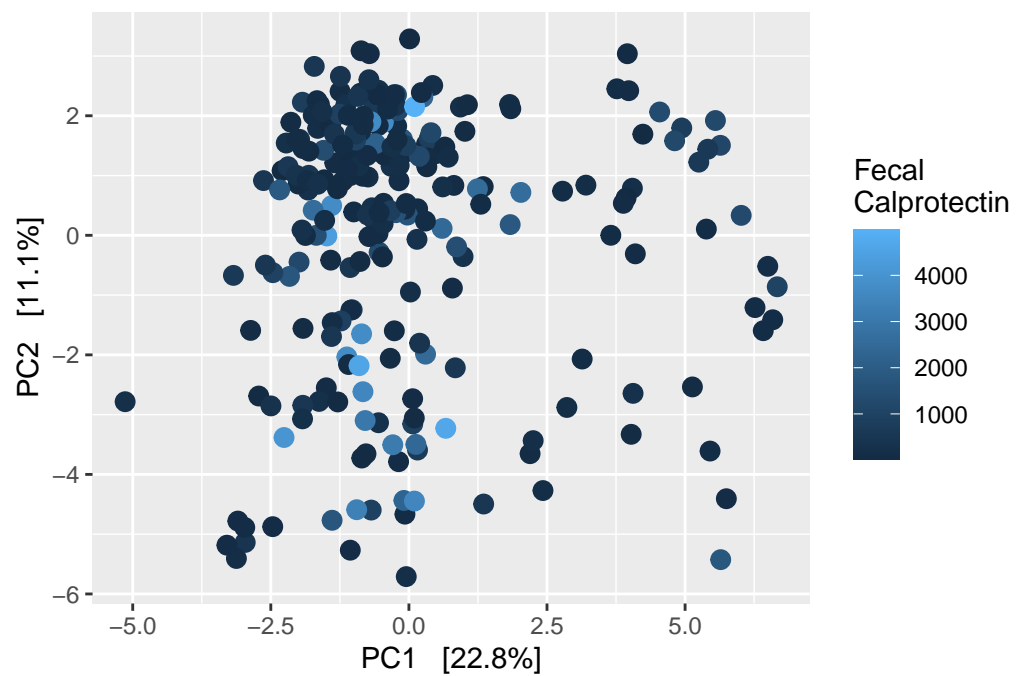

Supplement: izac175_suppl_supplementary_figure_s7.pdf [file izac175_suppl_supplementary_figure_s7.pdf]
